# Supplementary material for: A U-shaped association between the triglyceride to high-density lipoprotein cholesterol ratio and the risk of incident type 2 diabetes mellitus in Japanese men with normal glycemic levels: a population-based longitudinal cohort study
Source: PubMed Central journal article supplement (PMC10552638; doi:10.3389/fendo.2023.1180910), 2023-09-21
Supplement: DataSheet_1.pdf [file DataSheet_1.pdf]

## *Supplementary Material*

### 1 Supplementary figures

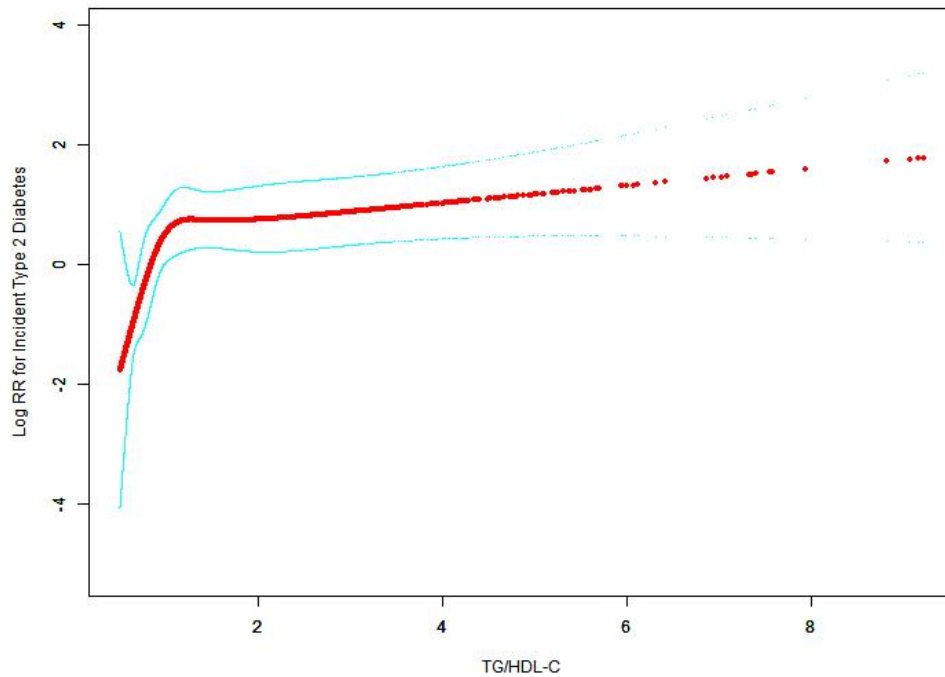

### Supplementary figure 1

**Association between TG/HDL-C and incident T2DM among women.**

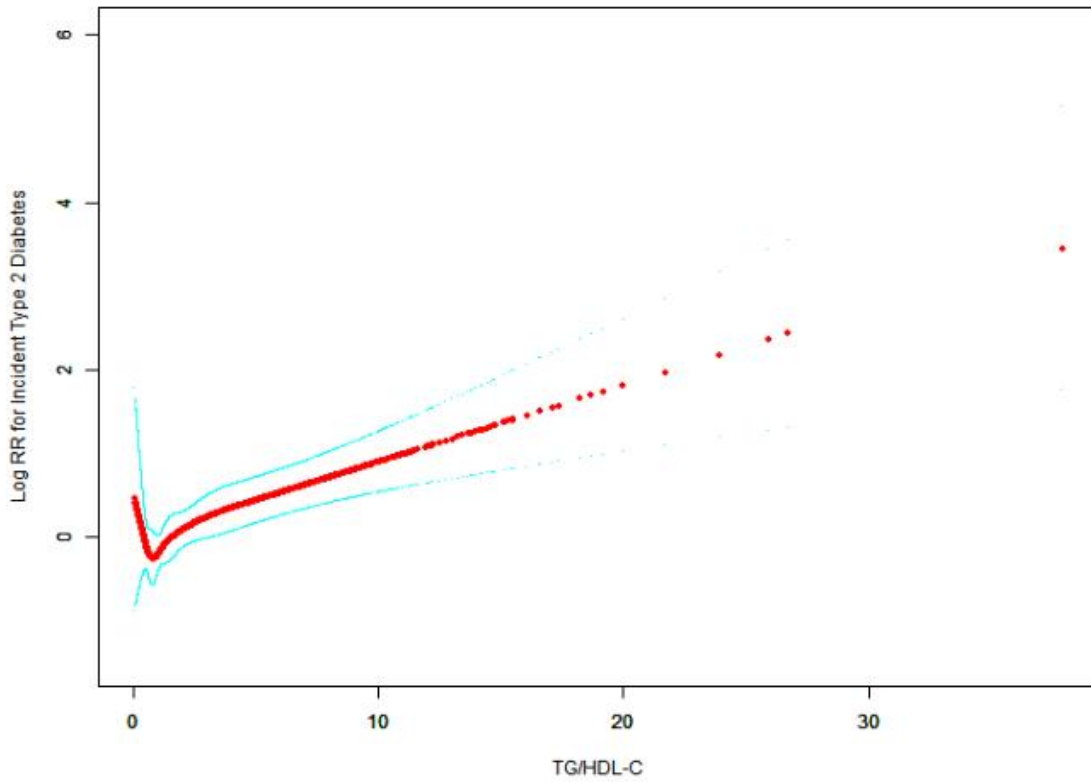

**Supplementary figure 2**

**Association between TG/HDL-C and incident T2DM among both men and women.**

**2 Supplementary Tables**

**Supplementary table 1**

|             | Statistics     | Incident Type 2 Diabetes | <i>p value</i> |
|-------------|----------------|--------------------------|----------------|
| Age, yr     | 43.796 ± 8.902 | 1.043 (1.024, 1.062)     | <0.00001       |
| Fatty liver |                |                          |                |
| No          | 5839 (75.989%) | 1                        |                |
| Yes         | 1845 (24.011%) | 4.482 (3.278, 6.129)     | <0.00001       |

|                                |                  |                         |          |
|--------------------------------|------------------|-------------------------|----------|
| BMI, kg/m <sup>2</sup>         | 22.890 ± 2.911   | 1.223 (1.181, 1.268)    | <0.00001 |
| Waist circumference, cm        | 80.068 ± 7.798   | 1.088 (1.071, 1.105)    | <0.00001 |
| ALT, IU/L                      | 23.329 ± 13.335  | 1.023 (1.017, 1.030)    | <0.00001 |
| AST, IU/L                      | 19.423 ± 7.593   | 1.030 (1.018, 1.042)    | <0.00001 |
| Body Weight, kg                | 66.903 ± 9.738   | 1.054 (1.042, 1.067)    | <0.00001 |
| Fasting plasma glucose, mmol/L | 5.283 ± 0.363    | 19.874 (12.053, 32.770) | <0.00001 |
| Systolic blood pressure, mmHg  | 118.413 ± 14.005 | 1.030 (1.020, 1.040)    | <0.00001 |
| Diastolic blood pressure, mmHg | 74.580 ± 9.882   | 1.044 (1.029, 1.059)    | <0.00001 |
| GGT, IU/L                      | 25.034 ± 20.339  | 1.010 (1.007, 1.013)    | <0.00001 |
| HDL-cholesterol, mmol/L        | 1.326 ± 0.342    | 0.179 (0.098, 0.327)    | <0.00001 |
| Total Cholesterol, mmol/L      | 5.128 ± 0.843    | 1.255 (1.053, 1.497)    | 0.01135  |
| Triglycerides, mmol/L          | 1.024 ± 0.548    | 2.327 (1.856, 2.918)    | <0.00001 |
| TG/HDL-C                       | 1.972 ± 1.319    | 1.469 (1.340, 1.610)    | <0.00001 |
| HbA1c, mmol/mol                | 32.474 ± 3.083   | 1.395 (1.317, 1.478)    | <0.00001 |
| Alcohol consumption            |                  |                         |          |
| Never                          | 4847 (63.079%)   | 1                       |          |
| Light                          | 1259 (16.385%)   | 0.739 (0.466, 1.173)    | 0.19941  |
| Moderate                       | 1080 (14.055%)   | 0.791 (0.485, 1.291)    | 0.34804  |
| Severe                         | 498 (6.481%)     | 1.686 (1.033, 2.752)    | 0.03662  |
| Smoking status                 |                  |                         |          |
| Never                          | 2695 (35.073%)   | 1                       |          |
| Past                           | 2280 (29.672%)   | 0.936 (0.608, 1.440)    | 0.76401  |

|                       |                |                      |         |
|-----------------------|----------------|----------------------|---------|
| Current               | 2709 (35.255%) | 1.542 (1.074, 2.215) | 0.01905 |
| Habit of exercise 0/1 |                |                      |         |
| No                    | 6196 (80.635%) | 1                    |         |
| Yes                   | 1488 (19.365%) | 0.766 (0.496, 1.181) | 0.22734 |

---

Continuous variables are presented as mean  $\pm$  S.D. or as median (Q1-Q4). Categorical data are presented as frequencies (percentages).

Abbreviation: Q, quartile; ALT, alanine aminotransferase; AST, aspartate aminotransferase; GGT, gamma-glutamyl transpeptidase; DBP, diastolic blood pressure; SBP, systolic blood pressure; TG, triglyceride; HDL-cholesterol, high-density lipoprotein-cholesterol; TG/HDL-C, triglyceride to high-density lipoprotein cholesterol ratio; HbA1c, Hemoglobin A1c; BMI, body mass index.
